# Supplementary material for: Gamma-irradiated SARS-CoV-2 vaccine candidate, OZG-38.61.3, confers protection from SARS-CoV-2 challenge in human ACEII-transgenic mice
Source: PubMed Central journal article supplement (PMC8339061; doi:10.1038/s41598-021-95086-4), 2021-08-04
Supplement: 41598_2021_95086_MOESM1_ESM.pdf [file 41598_2021_95086_MOESM1_ESM.pdf]

## **Supplementary Materials**

### **Gamma-irradiated SARS-CoV-2 vaccine candidate, OZG-38.61.3, confers protection from SARS-CoV-2 challenge in human ACEII-transgenic mice**

Raife Dilek Turan, Cihan Tastan, Derya Dilek Kancagi, Bulut Yurtsever, Gozde Sir Karakus, Samed Ozer, Selen Abanuz, Didem Cakirsoy, Gamze Tumentemur, Sevda Demir, Utku Seyis, Recai Kuzay, Muhammer Elek, Miyase Ezgi Kocaoglu, Gurcan Ertop, Serap Arbak, Merve Acikel Elmas, Cansu Hemsinlioglu, Ozden Hatirnaz Ng, Sezer Akyoney, Ilayda Sahin, Cavit Kerem Kayhan, Fatma Tokat, Gurler Akpinar, Murat Kasap, Ayse Sesin Kocagoz, Ugur Ozbek, Dilek Telci, Fikrettin Sahin, Koray Yalcin, Siret Ratip, Umit Ince, Ercument Ovali

Supplementary figures/tables

| Study groups     | Earring No         | Day 0 | Day 5 | Day 9 | Day 14 | Day 21 | Day 26/1 | Day 26/2 | Day 27/1 | Day 27/2 | Day 28/1 | Day 28/2 | Day 29 |       |
|------------------|--------------------|-------|-------|-------|--------|--------|----------|----------|----------|----------|----------|----------|--------|-------|
| Negative control | 40                 | 29,00 | 29,30 | 25,60 | 32,10  | 33,00  | NA       | NA       | NA       | NA       | NA       | NA       | 33,90  |       |
|                  | 41                 | 24,20 | 24,70 | 31,20 | 26,20  | 27,00  | NA       | NA       | NA       | NA       | NA       | NA       | 27,30  |       |
|                  | 42                 | 19,00 | 20,20 | 21,10 | 21,30  | 22,40  | NA       | NA       | NA       | NA       | NA       | NA       | 21,90  |       |
|                  | 43                 | 22,00 | 23,00 | 23,10 | 23,10  | 24,10  | NA       | NA       | NA       | NA       | NA       | NA       | 24,60  |       |
|                  | 44                 | 20,10 | 21,10 | 22,00 | 22,20  | 23,30  | NA       | NA       | NA       | NA       | NA       | NA       | 24,00  |       |
|                  | Average            | 22,86 | 23,66 | 24,60 | 24,98  | 25,96  | NA       | NA       | NA       | NA       | NA       | NA       | NA     | 26,34 |
|                  | Standard deviation | 3,96  | 3,60  | 4,06  | 4,39   | 4,30   | NA       | NA       | NA       | NA       | NA       | NA       | NA     | 4,64  |
| Positive Control | 45                 | 21,30 | 22,00 | 23,10 | 23,00  | 24,20  | 24,60    | 24,10    | 24,30    | 24,00    | 23,10    | 22,70    | 23,70  |       |
|                  | 46                 | 17,80 | 17,60 | 18,90 | 19,30  | 19,90  | 19,50    | 19,50    | 19,40    | 20,40    | 19,90    | 19,60    | 19,00  |       |
|                  | 47                 | 23,80 | 24,50 | 26,10 | 26,70  | 27,00  | 27,40    | 26,90    | 27,10    | 26,80    | 27,40    | 26,70    | 26,70  |       |
|                  | 48                 | 25,20 | 26,20 | 27,50 | 27,30  | 28,40  | 29,10    | 28,10    | 28,90    | 28,40    | 28,40    | 28,00    | 28,50  |       |
|                  | 49                 | 26,60 | 28,00 | 29,00 | 30,30  | 30,80  | 31,00    | 30,50    | 31,00    | 30,80    | 30,50    | 30,60    | 31,20  |       |
|                  | 50                 | 22,20 | 23,00 | 24,00 | 25,00  | 25,00  | 25,20    | 25,10    | 25,60    | 26,10    | 25,40    | 25,20    | 25,50  |       |
|                  | Average            | 22,82 | 23,55 | 24,77 | 25,27  | 25,88  | 26,13    | 25,70    | 26,05    | 26,08    | 25,78    | 25,47    | 25,77  |       |
|                  | Standard deviation | 3,12  | 3,63  | 3,60  | 3,80   | 3,77   | 4,03     | 3,78     | 4,03     | 3,60     | 3,84     | 3,91     | 4,20   |       |
| Do se 1 x        | 51                 | 28,80 | 29,00 | 30,60 | 30,50  | 31,30  | 31,80    | 31,20    | 31,50    | 31,00    | 31,20    | 25,30    | 32,00  |       |

|                                 |                           |       |       |       |       |       |       |       |       |       |       |       |       |
|---------------------------------|---------------------------|-------|-------|-------|-------|-------|-------|-------|-------|-------|-------|-------|-------|
|                                 | <b>52</b>                 | 22,10 | 22,70 | 23,90 | 24,90 | 24,70 | 25,00 | 25,10 | 25,10 | 25,70 | 25,40 | 30,80 | 25,70 |
|                                 | <b>53</b>                 | 27,80 | 28,50 | 30,10 | 30,30 | 30,80 | 32,10 | 31,20 | 31,50 | 31,20 | 30,80 | 31,00 | 31,70 |
|                                 | <b>54</b>                 | 26,40 | 27,80 | 30,60 | 30,20 | 30,60 | 31,30 | 31,40 | 31,40 | 31,20 | 31,50 | 30,90 | 31,30 |
|                                 | <b>55</b>                 | 25,20 | 26,10 | 27,30 | 27,30 | 27,60 | 28,60 | 28,20 | 28,70 | 29,10 | 28,20 | 27,60 | 28,40 |
|                                 | <b>56</b>                 | 25,10 | 25,70 | 27,70 | 27,60 | 27,80 | 28,90 | 29,00 | 29,20 | 29,00 | 29,30 | 28,70 | 29,70 |
|                                 | <b>57</b>                 | 30,10 | 31,20 | 33,20 | 33,30 | 34,00 | 35,00 | 31,00 | 35,00 | 33,80 | 34,80 | 34,10 | 34,30 |
|                                 | <b>Average</b>            | 26,50 | 27,29 | 29,06 | 29,16 | 29,54 | 30,39 | 29,59 | 30,34 | 30,14 | 30,17 | 29,77 | 30,44 |
|                                 | <b>Standard deviation</b> | 2,68  | 2,74  | 3,01  | 2,75  | 3,05  | 3,20  | 2,34  | 3,08  | 2,53  | 2,95  | 2,84  | 2,79  |
| <b>Dose 1 x 10<sup>14</sup></b> | <b>58</b>                 | 23,20 | 24,10 | 24,50 | 25,40 | 26,00 | 26,10 | 25,80 | 26,70 | 26,10 | 26,20 | 26,20 | 26,00 |
|                                 | <b>59</b>                 | 27,90 | 28,80 | 30,10 | 31,20 | 31,90 | 32,50 | 31,60 | 32,50 | 32,20 | 31,80 | 31,70 | 32,40 |
|                                 | <b>60</b>                 | 20,50 | 21,20 | 21,70 | 22,70 | 23,50 | 23,70 | 23,20 | 23,50 | 22,80 | 23,40 | 22,90 | 23,30 |
|                                 | <b>61</b>                 | 28,50 | 28,90 | 30,20 | 31,30 | 31,80 | 32,00 | 32,70 | 32,10 | 32,30 | 31,90 | 32,00 | 32,60 |
|                                 | <b>62</b>                 | 24,60 | 24,80 | 26,20 | 26,40 | 27,10 | 27,70 | 27,60 | 28,00 | 27,30 | 27,50 | 27,90 | 27,30 |
|                                 | <b>63</b>                 | 26,10 | 26,70 | 28,40 | 28,60 | 29,50 | 29,50 | 29,50 | 29,70 | 29,80 | 29,50 | 29,30 | 30,20 |
|                                 | <b>64</b>                 | 25,30 | 26,10 | 27,90 | 28,30 | 29,20 | 30,00 | 29,90 | 30,12 | 29,70 | 29,60 | 29,40 | 21,70 |
|                                 | <b>Average</b>            | 25,16 | 25,80 | 27,00 | 27,70 | 28,43 | 28,79 | 28,61 | 28,95 | 28,60 | 28,56 | 28,49 | 27,64 |
|                                 | <b>Standard deviation</b> | 2,75  | 2,73  | 3,10  | 3,12  | 3,09  | 3,17  | 3,32  | 3,17  | 3,44  | 3,08  | 3,19  | 4,30  |

**Supplementary Table 1: Viral Challenge Individual Weight (gr) Changes Evaluation Chart.**

| <b>Nucleotide Position</b> | <b>Gene/Region</b> | <b>Gene Product</b>          | <b>Nucleotide Exchange (Ref/Alt)</b> | <b>Amino acid exchange</b> | <b>Mutation Type</b> |
|----------------------------|--------------------|------------------------------|--------------------------------------|----------------------------|----------------------|
| 241                        | 5' UTR             | NA                           | C/T                                  | NA                         | Non-coding           |
| 913                        | ORF1ab             | Nsp2                         | C/T                                  | S36S                       | Synonymous           |
| 3037                       | ORF1ab             | Nsp3                         | C/T                                  | F106F                      | Synonymous           |
| 12809                      | ORF1ab             | Nsp9                         | C/T                                  | L42F                       | Missense             |
| 13170                      | ORF1ab             | Nsp10                        | C/T                                  | T49I                       | Missense             |
| 14408                      | ORF1ab             | RNA-dependent RNA Polymerase | C/T                                  | P323L                      | Missense             |
| 14676                      | ORF1ab             | RNA-dependent RNA Polymerase | C/T                                  | P412P                      | Synonymous           |
| 21648                      | S                  | Spike glycoprotein           | C/T                                  | T29I                       | Missense             |
| 21789                      | S                  | Spike glycoprotein           | C/T                                  | T76I                       | Missense             |
| 21846                      | S                  | Spike glycoprotein           | C/T                                  | T95I                       | Missense             |
| 22036                      | S                  | Spike glycoprotein           | A/C                                  | R158S                      | Missense             |
| 22117                      | S                  | Spike glycoprotein           | T/G                                  | N185K                      | Missense             |
| 23014                      | S                  | Spike glycoprotein           | A/T                                  | E484D                      | Missense             |
| 23403                      | S                  | Spike glycoprotein           | A/G                                  | D614G                      | Missense             |
| 23520                      | S                  | Spike glycoprotein           | C/T                                  | E653D                      | Missense             |
| 23997                      | S                  | Spike glycoprotein           | C/T                                  | P812L                      | Missense             |
| 24538                      | S                  | Spike glycoprotein           | A/C                                  | Q992H                      | Missense             |
| 26324                      | E                  | Envelope protein             | T/C                                  | L27S                       | Missense             |
| 26542                      | M                  | Membrane glycoprotein        | C/T                                  | T7I                        | Missense             |
| 26559                      | M                  | Membrane glycoprotein        | C/T                                  | L13F                       | Missense             |
| 28881                      | N                  | Nucleocapsid phosphoprotein  | G/A                                  | R204K                      | Missense             |
| 28882                      | N                  | Nucleocapsid phosphoprotein  | G/A                                  | R204K                      | Missense             |
| 28883                      | N                  | Nucleocapsid phosphoprotein  | G/C                                  | G204R                      | Missense             |

**Supplementary Table 2:** Viral Genome Sequencing analysis of fractionated SARS-CoV-2 strains forming OZG-38.61.3 vaccine candidate.

| <b>Parameter</b>                       | <b>Method</b>                                      | <b>Limit</b>                                     | <b>Result</b>          |
|----------------------------------------|----------------------------------------------------|--------------------------------------------------|------------------------|
| <b>Appearance</b>                      | Visual inspection                                  | Dry Grayish Powder                               | Passed                 |
| <b>Identity</b>                        | Single Radial Immunodiffusion (SRID)               | Positive                                         | Positive               |
|                                        | TEM                                                | Positive                                         | Positive               |
| <b>Size And Particle Analysis</b>      | Nanosight<br>Zetasizer                             | Size <200 Nm<br>Particle >1x10 <sup>8</sup> MI   | Passed                 |
| <b>Virus Copy Number/Dose Analysis</b> | qRT-PCR                                            | *≥ 1x10 <sup>13</sup><br>*≥ 1x10 <sup>14</sup>   | Passed                 |
| <b>Biochemical Analysis</b>            | Ph, Na, Cl, K, Ca, Glucose, Total Protein, Albumin | Reference Interval<br>≥ 70 µg total protein/dose | Passed                 |
| <b>Relative Humidity</b>               | Moisture Analyzer                                  | <%3                                              | Passed                 |
| <b>Purity</b>                          | Vero Protein ELISA                                 | <4 ng                                            | Passed                 |
|                                        | Vero Dna Nanodrop                                  | <10 ng                                           | Passed                 |
| <b>Replicative Virus Test</b>          | Real-Time Cell Analysis (RTCA) or MTT              | -                                                | Passed                 |
| <b>Proteome</b>                        | Mass Spectrometer                                  | -                                                | Passed                 |
| <b>Microbiological Quality Control</b> | Culture                                            | Negative                                         | Negative               |
|                                        | Gram Stain                                         | Negative                                         | Negative               |
| <b>Fungi</b>                           | Culture                                            | Negative                                         | Negative               |
| <b>Mycoplasma</b>                      | PCR                                                | Negative                                         | Negative               |
| <b>Endotoxin</b>                       | Lal Test                                           | <0.5 IU/ml                                       | Passed                 |
| <b>Stability/Efficiency</b>            | Single Radial Immunodiffusion (SRID)               | Positive                                         | Efficiency analysis of |

|  |  |  |                                                         |
|--|--|--|---------------------------------------------------------|
|  |  |  | 0,1,6,12,24 and 26 months in 4-24°C storage conditions. |
|--|--|--|---------------------------------------------------------|

**Supplementary Table 3:** Quality Control tests of the lyophilized product of OZG-38.61.3 vaccine candidate. \* Infective SARS-CoV-2 viral copy number in a dose.

| Accession         | Description                                                                 | Coverage [%] | # PSM | # Peptide | # AAs | MW [kDa] | calc. pI | Score Sequest HT |
|-------------------|-----------------------------------------------------------------------------|--------------|-------|-----------|-------|----------|----------|------------------|
| <b>A0A6G7SLW8</b> | Orf1ab polyprotein OS=Severe acute respiratory syndrome coronavirus 2       | 1,02860      | 19    | 4         | 7097  | 793,7    | 6,76     | 0                |
| <b>A0A6C0T6Z7</b> | Nucleoprotein OS=Severe acute respiratory syndrome coronavirus 2 O          | 42,0047      | 30    | 12        | 419   | 45,6     | 10,07    | 56,69            |
| <b>A0A679G9E9</b> | S protein OS=Severe acute respiratory syndrome coronavirus 2                | 0,54988      | 1     | 1         | 1273  | 141,1    | 6,65     | 0                |
| <b>A0A6C0N6C6</b> | Nonstructural protein NS8 OS=Severe acute respiratory syndrome coronavirus2 | 23,9669      | 2     | 2         | 121   | 13,8     | 5,73     | 0                |
| <b>A0A6H2LA46</b> | ORF1ab polyprotein OS=Severe acute respiratory syndrome coronavirus 2       | 1,02874      | 19    | 4         | 7096  | 792,5    | 6,7      | 0                |
| <b>A0A6H2LAX8</b> | ORF1ab polyprotein OS=Severe acute respiratory syndrome coronavirus 2       | 1,02874      | 19    | 4         | 7096  | 793,5    | 6,76     | 0                |
| <b>A0A6H1PMM5</b> | Surface glycoprotein OS=Severe acute respiratory syndrome coronavirus 2     | 0,54988      | 1     | 1         | 1273  | 141,1    | 6,61     | 0                |
| <b>A0A6H2L905</b> | ORF1ab polyprotein OS=Severe acute respiratory syndrome coronavirus 2       | 1,02874      | 19    | 4         | 7096  | 793,5    | 6,76     | 0                |
| <b>A0A6H2LC46</b> | Surface glycoprotein OS=Severe acute respiratory syndrome coronavirus 2     | 0,54988      | 1     | 1         | 1273  | 140,3    | 6,76     | 0                |
| <b>A0A6H2LCV0</b> | ORF1ab polyprotein OS=Severe acute respiratory syndrome coronavirus 2       | 1,02874      | 19    | 4         | 7096  | 793,5    | 6,76     | 0                |
| <b>A0A6H2L673</b> | Surface glycoprotein OS=Severe acute respiratory syndrome coronavirus 2     | 0,54988      | 1     | 1         | 1273  | 141,1    | 6,73     | 0                |
| <b>A0A6H2L7S6</b> | ORF1ab polyprotein OS=Severe acute respiratory syndrome coronavirus 2       | 1,02874      | 19    | 4         | 7096  | 793,7    | 6,76     | 0                |

|                   |                                                                                    |         |    |    |      |       |       |       |
|-------------------|------------------------------------------------------------------------------------|---------|----|----|------|-------|-------|-------|
| <b>A0A6H2L8K8</b> | ORF1ab polyprotein OS=Severe acute respiratory syndrome coronavirus 2              | 1,02874 | 19 | 4  | 7096 | 793,5 | 6,62  | 0     |
| <b>A0A6H2L9B8</b> | ORF1ab polyprotein OS=Severe acute respiratory syndrome coronavirus 2              | 1,02874 | 19 | 4  | 7096 | 793,6 | 6,76  | 0     |
| <b>A0A6H2LBL6</b> | ORF1ab polyprotein OS=Severe acute respiratory syndrome coronavirus 2              | 1,02874 | 19 | 4  | 7096 | 793,6 | 6,76  | 0     |
| <b>A0A6H2LDA7</b> | ORF1ab polyprotein OS=Severe acute respiratory syndrome coronavirus 2              | 1,02874 | 19 | 4  | 7096 | 792,9 | 6,64  | 0     |
| <b>A0A6H2LBC7</b> | ORF1ab polyprotein OS=Severe acute respiratory syndrome coronavirus 2              | 1,02874 | 19 | 4  | 7096 | 793,2 | 6,68  | 0     |
| <b>A0A6H2LA93</b> | Nucleocapsid phosphoprotein OS=Severe acute respiratory syndrome coronavirus 2     | 42,0047 | 30 | 12 | 419  | 45,6  | 10,07 | 56,69 |
| <b>A0A6H2L973</b> | ORF1ab polyprotein OS=Severe acute respiratory syndrome coronavirus 2              | 1,02874 | 19 | 4  | 7096 | 793   | 6,81  | 0     |
| <b>A0A6H2L8H9</b> | ORF1ab polyprotein OS=Severe acute respiratory syndrome coronavirus 2              | 1,02874 | 19 | 4  | 7096 | 793,6 | 6,76  | 0     |
| <b>A0A6H2LAC5</b> | ORF1ab polyprotein OS=Severe acute respiratory syndrome coronavirus 2              | 1,02874 | 19 | 4  | 7096 | 793,3 | 6,71  | 0     |
| <b>A0A6H2LBD2</b> | Surface glycoprotein OS=Severe acute respiratory syndrome coronavirus 2            | 0,54988 | 1  | 1  | 1273 | 141   | 6,73  | 0     |
| <b>A0A6H2L6R1</b> | ORF1ab polyprotein (Fragment) OS=Severe acute respiratory syndrome coronavirus 2   | 1,04539 | 19 | 4  | 6983 | 780,6 | 6,77  | 0     |
| <b>A0A6H2L7I9</b> | ORF1ab polyprotein OS=Severe acute respiratory syndrome coronavirus 2              | 1,02874 | 19 | 4  | 7096 | 793,2 | 6,7   | 0     |
| <b>A0A6H2LC40</b> | Surface glycoprotein OS=Severe acute respiratory syndrome coronavirus 2            | 0,54988 | 1  | 1  | 1273 | 140,9 | 6,73  | 0     |
| <b>A0A6H2LBU1</b> | Surface glycoprotein (Fragment) OS=Severe acute respiratory syndrome coronavirus 2 | 0,61946 | 1  | 1  | 1130 | 124,9 | 6,44  | 0     |
| <b>A0A6H2LC49</b> | ORF1ab polyprotein OS=Severe acute respiratory syndrome coronavirus 2              | 1,02874 | 19 | 4  | 7096 | 793,6 | 6,76  | 0     |
| <b>A0A6H2L683</b> | Surface glycoprotein OS=Severe acute respiratory syndrome coronavirus 2            | 0,54988 | 1  | 1  | 1273 | 141,1 | 6,81  | 0     |
| <b>A0A6H2LDI3</b> | ORF1ab polyprotein OS=Severe acute respiratory syndrome coronavirus 2              | 1,02874 | 19 | 4  | 7096 | 793,5 | 6,73  | 0     |
| <b>A0A6H2L877</b> | ORF1ab polyprotein OS=Severe acute respiratory syndrome coronavirus 2              | 1,02874 | 19 | 4  | 7096 | 793,6 | 6,76  | 0     |
| <b>A0A6H2L915</b> | Nucleocapsid phosphoprotein OS=Severe acute respiratory syndrome coronavirus 2     | 42,0047 | 30 | 12 | 419  | 45,7  | 10,05 | 56,69 |

|                   |                                                                                |         |    |    |      |       |       |       |
|-------------------|--------------------------------------------------------------------------------|---------|----|----|------|-------|-------|-------|
| <b>A0A6H2LBN3</b> | ORF8 protein OS=Severe acute respiratory syndrome coronavirus 2                | 23,9669 | 2  | 2  | 121  | 13,8  | 5,73  | 0     |
| <b>A0A6H2L880</b> | ORF1ab polyprotein OS=Severe acute respiratory syndrome coronavirus 2          | 1,02874 | 19 | 4  | 7096 | 793,1 | 6,62  | 0     |
| <b>A0A6H2LAL1</b> | ORF1ab polyprotein OS=Severe acute respiratory syndrome coronavirus 2          | 1,02874 | 19 | 4  | 7096 | 793,6 | 6,76  | 0     |
| <b>A0A6H2L964</b> | Surface glycoprotein OS=Severe acute respiratory syndrome coronavirus 2        | 0,54988 | 1  | 1  | 1273 | 141,1 | 6,73  | 0     |
| <b>A0A6H2L9W1</b> | ORF1ab polyprotein OS=Severe acute respiratory syndrome coronavirus 2          | 1,02874 | 19 | 4  | 7096 | 793,6 | 6,76  | 0     |
| <b>A0A6H2LCH0</b> | ORF1ab polyprotein OS=Severe acute respiratory syndrome coronavirus 2          | 1,02874 | 19 | 4  | 7096 | 793,6 | 6,76  | 0     |
| <b>A0A6H2L702</b> | Surface glycoprotein OS=Severe acute respiratory syndrome coronavirus 2        | 0,54988 | 1  | 1  | 1273 | 141,1 | 6,65  | 0     |
| <b>A0A6H1PRW5</b> | ORF1ab polyprotein OS=Severe acute respiratory syndrome coronavirus 2          | 1,02874 | 19 | 4  | 7096 | 793,6 | 6,76  | 0     |
| <b>A0A6H2L7Z5</b> | Nucleocapsid phosphoprotein OS=Severe acute respiratory syndrome coronavirus 2 | 42,0047 | 30 | 12 | 419  | 45,6  | 10,07 | 56,69 |
| <b>A0A6H2L6T0</b> | Nucleocapsid phosphoprotein OS=Severe acute respiratory syndrome coronavirus 2 | 42,0047 | 30 | 12 | 419  | 45,6  | 10,07 | 56,69 |
| <b>A0A6H2LA09</b> | ORF1ab polyprotein OS=Severe acute respiratory syndrome coronavirus 2          | 1,02874 | 19 | 4  | 7096 | 793   | 6,71  | 0     |
| <b>A0A6H2LCI8</b> | ORF1ab polyprotein OS=Severe acute respiratory syndrome coronavirus 2          | 1,02874 | 19 | 4  | 7096 | 793,6 | 6,76  | 0     |
| <b>A0A6H2L7Z4</b> | ORF1ab polyprotein OS=Severe acute respiratory syndrome coronavirus 2          | 1,02874 | 19 | 4  | 7096 | 793,7 | 6,76  | 0     |
| <b>A0A6H2LA55</b> | ORF1ab polyprotein OS=Severe acute respiratory syndrome coronavirus 2          | 1,02874 | 19 | 4  | 7096 | 793,6 | 6,8   | 0     |
| <b>A0A6H2L7V1</b> | Nucleocapsid phosphoprotein OS=Severe acute respiratory syndrome coronavirus 2 | 42,0047 | 30 | 12 | 419  | 45,6  | 10,07 | 56,69 |
| <b>A0A6H2LD79</b> | ORF1ab polyprotein OS=Severe acute respiratory syndrome coronavirus 2          | 1,02874 | 19 | 4  | 7096 | 793,6 | 6,76  | 0     |
| <b>A0A6H2L9L2</b> | ORF1ab polyprotein OS=Severe acute respiratory syndrome coronavirus 2          | 1,02874 | 19 | 4  | 7096 | 793,2 | 6,71  | 0     |
| <b>A0A6H2L6I9</b> | ORF1ab polyprotein OS=Severe acute respiratory syndrome coronavirus 2          | 1,02874 | 19 | 4  | 7096 | 792,9 | 6,7   | 0     |
| <b>A0A6H2LAG5</b> | Surface glycoprotein OS=Severe acute respiratory syndrome coronavirus 2        | 0,54988 | 1  | 1  | 1273 | 140,6 | 6,04  | 0     |
| <b>A0A6H2L8N1</b> | ORF1ab polyprotein OS=Severe acute respiratory syndrome coronavirus 2          | 1,02874 | 19 | 4  | 7096 | 793,6 | 6,76  | 0     |



|                   |                                                                                |          |    |    |      |       |       |       |
|-------------------|--------------------------------------------------------------------------------|----------|----|----|------|-------|-------|-------|
| <b>A0A6G7SLV1</b> | Orf1ab polyprotein OS=Severe acute respiratory syndrome coronavirus 2          | 1,02874  | 19 | 4  | 7096 | 793,6 | 6,76  | 0     |
| <b>A0A6H2EH11</b> | ORF1ab polyprotein OS=Severe acute respiratory syndrome coronavirus 2          | 1,02874  | 19 | 4  | 7096 | 793,5 | 6,76  | 0     |
| <b>A0A6H0QT63</b> | ORF1ab polyprotein OS=Severe acute respiratory syndrome coronavirus 2          | 1,02874  | 19 | 4  | 7096 | 793,5 | 6,76  | 0     |
| <b>A0A6H2L7L3</b> | Surface glycoprotein OS=Severe acute respiratory syndrome coronavirus 2        | 0,54988  | 1  | 1  | 1273 | 141   | 6,81  | 0     |
| <b>A0A6H2L5M8</b> | Nucleocapsid phosphoprotein OS=Severe acute respiratory syndrome coronavirus 2 | 42,0047  | 30 | 12 | 419  | 45,7  | 10,08 | 56,69 |
| <b>A0A6H2LAI7</b> | ORF1ab polyprotein OS=Severe acute respiratory syndrome coronavirus 2          | 1,02874  | 19 | 4  | 7096 | 793,6 | 6,76  | 0     |
| <b>A0A6H2LEE1</b> | ORF1ab polyprotein OS=Severe acute respiratory syndrome coronavirus 2          | 1,02874  | 19 | 4  | 7096 | 793,6 | 6,76  | 0     |
| <b>A0A6H2LBP4</b> | ORF1ab polyprotein OS=Severe acute respiratory syndrome coronavirus 2          | 1,02874  | 19 | 4  | 7096 | 793,6 | 6,74  | 0     |
| <b>A0A6H2L794</b> | ORF1ab polyprotein OS=Severe acute respiratory syndrome coronavirus 2          | 1,02874  | 19 | 4  | 7096 | 793,6 | 6,76  | 0     |
| <b>A0A6H2LCV8</b> | ORF1ab polyprotein OS=Severe acute respiratory syndrome coronavirus 2          | 1,02874  | 19 | 4  | 7096 | 793,6 | 6,76  | 0     |
| <b>A0A6C0RS15</b> | 2'-O-methyltransferase OS=Severe acute respiratory syndrome coronavirus2       | 1,028749 | 19 | 4  | 7096 | 793,6 | 6,76  | 0     |
| <b>A0A6G7SLW0</b> | Orf1ab polyprotein OS=Severe acute respiratory syndrome coronavirus 2          | 1,02874  | 19 | 4  | 7096 | 793,5 | 6,74  | 0     |
| <b>A0A6H2LB79</b> | ORF1ab polyprotein OS=Severe acute respiratory syndrome coronavirus 2          | 1,028749 | 19 | 4  | 7096 | 793,6 | 6,76  | 0     |
| <b>A0A6H2LB01</b> | ORF1ab polyprotein OS=Severe acute respiratory syndrome coronavirus 2          | 1,02874  | 19 | 4  | 7096 | 792,8 | 6,71  | 0     |

**Supplementary Table 4:** LC-MS/MS results of candidate vaccine sample developed against the SARS-CoV-2 virus. OX=2697049.

**Table 5a:**

|                          | <b>Control</b> | <b>1x10<sup>13</sup></b> | <b>1x10<sup>14</sup></b> |
|--------------------------|----------------|--------------------------|--------------------------|
| <b>Total Body Weight</b> | 35,16±0,9      | 35,16±0,8                | 35,16±0,7                |
| <b>Lung</b>              | 1,34±0,01      | 1,34±0,03                | 1,343±0,02               |
| <b>Liver</b>             | 2,59±0,14      | 2,59±0,19                | 2,59±0,18                |
| <b>Spleen</b>            | 1,22±0,01      | 1,22±0,01                | 1,22±0,01                |
| <b>Kidney</b>            | 2,64±0,03      | 2,64±0,04                | 2,64±0,05                |

**Table 5b:**

|                     | <b>Control</b> | <b>1x10<sup>13</sup></b> | <b>1x10<sup>14</sup></b> |
|---------------------|----------------|--------------------------|--------------------------|
| <b>Inflammation</b> | 2/5*           | 1/5*                     | 1/5*                     |
| <b>Hemorrhage</b>   | 0/5            | 0/5                      | 0/5                      |
| <b>Eosinophil</b>   | 0/5            | 1/5                      | 0/5                      |

**Table 5c:**

|                     | <b>Control</b> | <b>1x10<sup>13</sup></b> | <b>1x10<sup>14</sup></b> |
|---------------------|----------------|--------------------------|--------------------------|
| <b>Inflammation</b> | 0/5            | 2/5*                     | 0/5                      |
| <b>Hemorrhage</b>   | 0/5            | 0/5                      | 0/5                      |
| <b>Eosinophil</b>   | 0/5            | 0/5                      | 0/5                      |

**Table 5d:**

|                     | <b>Control</b> | <b>1x10<sup>13</sup></b> | <b>1x10<sup>14</sup></b> |
|---------------------|----------------|--------------------------|--------------------------|
| <b>Inflammation</b> | 1/5*           | 1/5*                     | 0/5                      |
| <b>Hemorrhage</b>   | 0/5            | 0/5                      | 0/5                      |
| <b>Eosinophil</b>   | 0/5            | 0/5                      | 0/5                      |

**Supplementary Table 5: Organ weights and histopathological analysis vaccinated Balb/c mice. A.** Organ Weights Chart. **B.** Histological Analysis of the lung. **C.** the kidney **D.** the liver tissues. Control mice, n=5, Dose 10<sup>13</sup> vaccinated mice, n=5, and Dose 10<sup>14</sup> vaccinated mice, n=5.  
\*mild inflammation

| <b>Groups</b>                                                       | <b>Earring no</b>         | <b>Lung H-Score</b> |
|---------------------------------------------------------------------|---------------------------|---------------------|
| <b>Negative Control</b><br><b>(Human lung and placental tissue)</b> | <b>40</b>                 | 0,00                |
|                                                                     | <b>41</b>                 | 0,00                |
|                                                                     | <b>42</b>                 | 1,00                |
|                                                                     | <b>43</b>                 | 2,00                |
|                                                                     | <b>44</b>                 | 0,00                |
|                                                                     | <b>Average</b>            | 0,60                |
|                                                                     | <b>Standard deviation</b> | 0,89                |
| <b>Positive Control</b><br><b>(SARS-CoV-2 infected mice)</b>        | <b>45</b>                 | 46,00               |
|                                                                     | <b>46</b>                 | 76,00               |
|                                                                     | <b>47</b>                 | 59,00               |
|                                                                     | <b>48</b>                 | 34,00               |
|                                                                     | <b>49</b>                 | 71,00               |
|                                                                     | <b>50</b>                 | 95,00               |
|                                                                     | <b>Average</b>            | 63,50               |
| <b>Dose 1 x 10<sup>13</sup></b><br><b>administrated mice</b>        | <b>Standard deviation</b> | 21,92               |
|                                                                     | <b>51</b>                 | 26,00               |
|                                                                     | <b>52</b>                 | 42,00               |
|                                                                     | <b>53</b>                 | 38,00               |
|                                                                     | <b>54</b>                 | 29,00               |
|                                                                     | <b>55</b>                 | 28,00               |

|                                                              |                           |       |
|--------------------------------------------------------------|---------------------------|-------|
|                                                              | <b>56</b>                 | 33,00 |
|                                                              | <b>57</b>                 | 37,00 |
|                                                              | <b>Ortalama</b>           | 33,29 |
|                                                              | <b>Standard deviation</b> | 5,94  |
| <b>Dose 1 x 10<sup>14</sup></b><br><b>administrated mice</b> | <b>58</b>                 | 0,00  |
|                                                              | <b>59</b>                 | 1,00  |
|                                                              | <b>60</b>                 | 3,00  |
|                                                              | <b>61</b>                 | 2,00  |
|                                                              | <b>62</b>                 | 0,00  |
|                                                              | <b>63</b>                 | 0,00  |
|                                                              | <b>64</b>                 | 0,00  |
|                                                              | <b>Average</b>            | 0,86  |
|                                                              | <b>Standard deviation</b> | 1,21  |
| <b>Overall</b>                                               | <b>Average</b>            | 24,92 |
|                                                              | <b>Standard deviation</b> | 28,18 |

**Supplementary Table 6. Lung Tissue Immunohistochemistry Image (H-score Analysis) Individual Evaluation Chart.** In the statistical analysis of these analyzes, the control groups and dose groups were compared using the Student's t-test method. Significance between groups was added to the graph. ( $p < 0.05$ ).

|                     | Cq    | Formül | Anti-Log   | x 5x10 <sup>3</sup><br>copy/ml<br>dilution factor | x 5x10 <sup>4</sup><br>copy/ml<br>dilution factor | x 5x10 <sup>5</sup><br>copy/ml<br>dilution factor | x 5x10 <sup>6</sup><br>copy/ml<br>dilution factor |
|---------------------|-------|--------|------------|---------------------------------------------------|---------------------------------------------------|---------------------------------------------------|---------------------------------------------------|
| 1st test            |       |        |            |                                                   |                                                   |                                                   |                                                   |
| SC2 10 <sup>0</sup> | 18,79 | 6,69   | 4920796,42 |                                                   |                                                   |                                                   |                                                   |
| SC2 10 <sup>1</sup> | 21,14 | 5,65   | 448964,90  | 2,24x10 <sup>9</sup>                              |                                                   |                                                   |                                                   |
| SC2 10 <sup>2</sup> | 24,33 | 4,24   | 17406,36   |                                                   | 8,7x10 <sup>8</sup>                               |                                                   |                                                   |
| SC2 10 <sup>3</sup> | 27,48 | 2,85   | 702,91     |                                                   |                                                   | 35x10 <sup>7</sup>                                |                                                   |
| 2nd test            |       |        |            |                                                   |                                                   |                                                   |                                                   |
| SC2 10 <sup>2</sup> | 24,85 | 4,01   | 10247,54   |                                                   | 5,12x10 <sup>8</sup>                              |                                                   |                                                   |
| SC2 10 <sup>3</sup> | 28,38 | 2,45   | 280,98     |                                                   |                                                   | 14x10 <sup>7</sup>                                |                                                   |
| SC2 10 <sup>4</sup> | 31,33 | 1,14   | 13,91      |                                                   |                                                   |                                                   | 6,95x10 <sup>7</sup>                              |

**Supplementary Table 7. Calculation of copy number based on Cq value based on World Health Organization (WHO) SARS-CoV-2 RNA copy number standard analysis (International Unit per ml; IU/ml).**

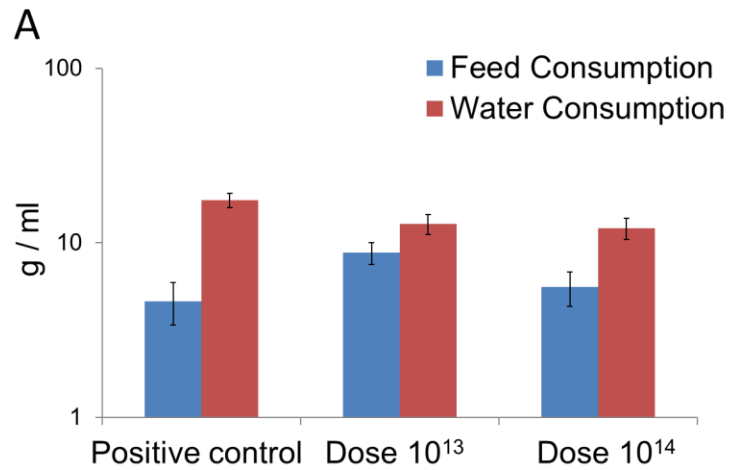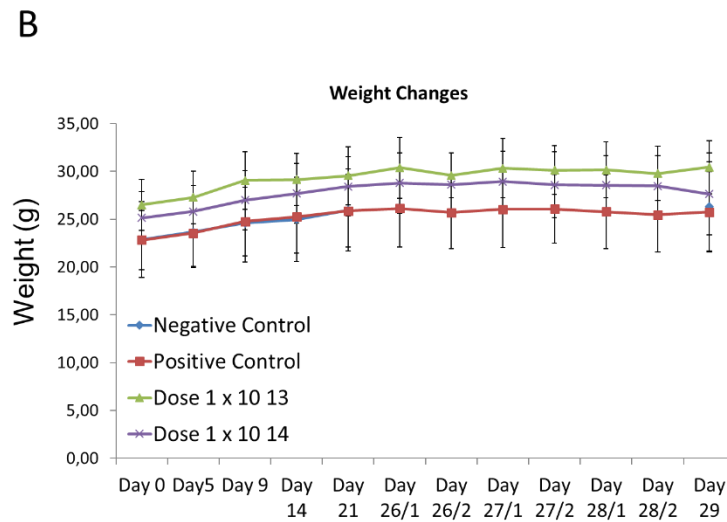

**Supplementary Figure 1. Health state of challenge test mice. A.** Feed and Water consumption per day post-infection of the positive control group, dose  $1 \times 10^{13}$ , and  $1 \times 10^{14}$  groups. **B.** Monitoring. Bodyweight changes during challenge experiments.

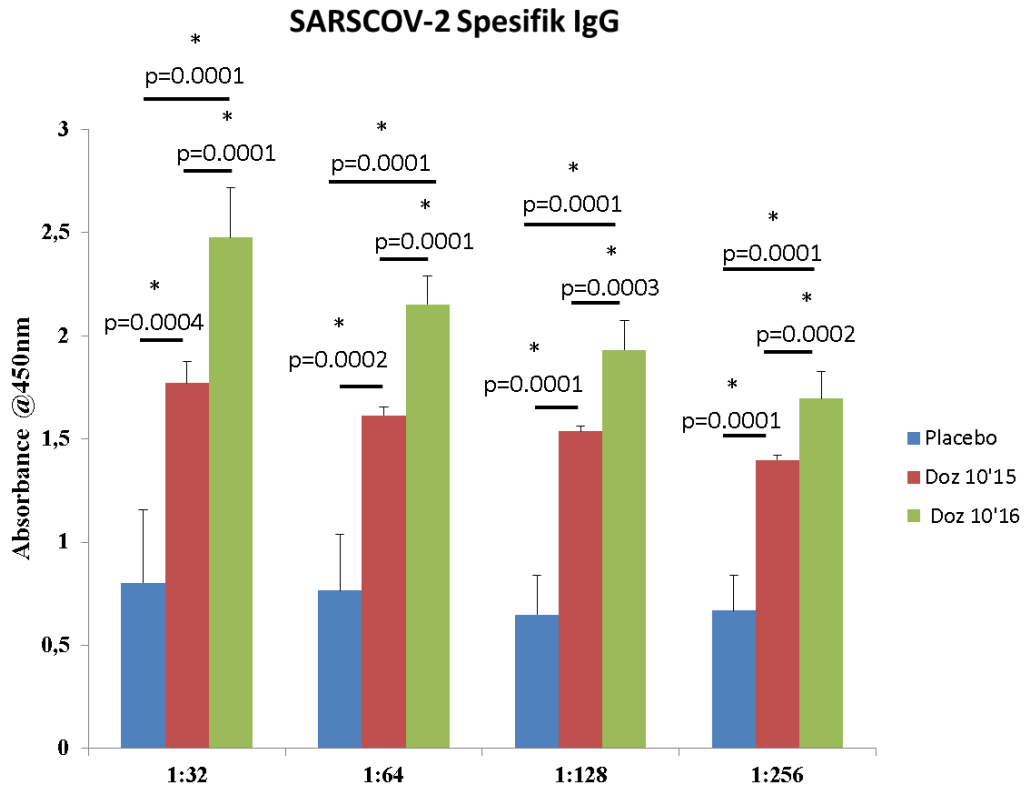

**Supplementary Figure 2. Repeat Dose Study in Rodents Immune Responses (SARS-CoV-2 Specific IgG Analysis).** The 21-day administrated rodent serums were studied with the Creative Diagnostic SARS-CoV-2 Specific IgG Elisa kit by diluting in 1:32, 1:64, 1:128, 1:256 dilution factors of test groups including placebo, dose  $1 \times 10^{15}$ , dose  $1 \times 10^{16}$  vaccine. Measured absorbance at 450nm, absorbance averages, and absorbance standard deviation values are indicated.

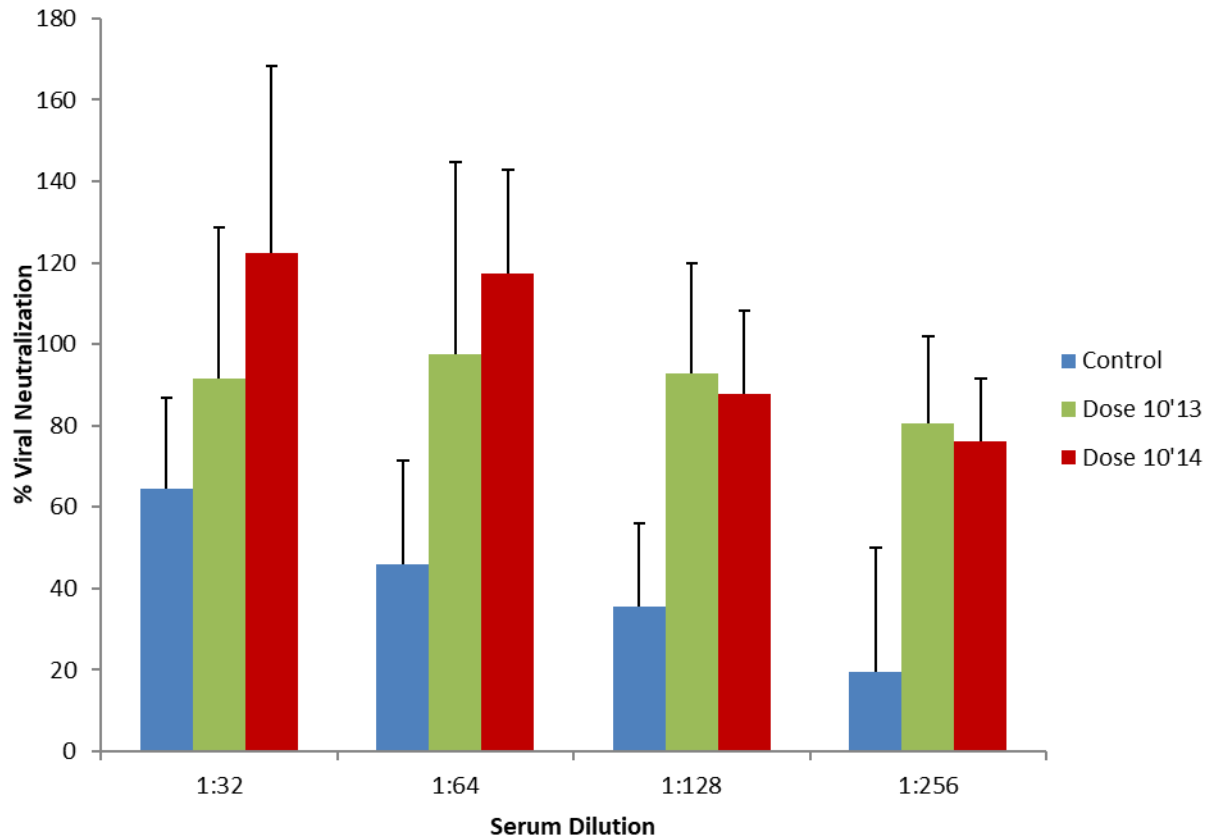

**Supplementary Figure 3. Neutralization analysis in repeated dose administrated rodents.** In a repeated-dose study in rodents, rats were treated with placebo, dose 10<sup>13</sup>, and dose 10<sup>14</sup> vaccine were diluted in 1:32, 1:64, 1:128, 1:256 dilution factors and cultured on Vero cells after treatment with 1000 TCID<sub>50</sub> Brazilian strain of SARS-CoV-2 virus. 96 hours later, neutralization efficacy was determined by MTT analysis.



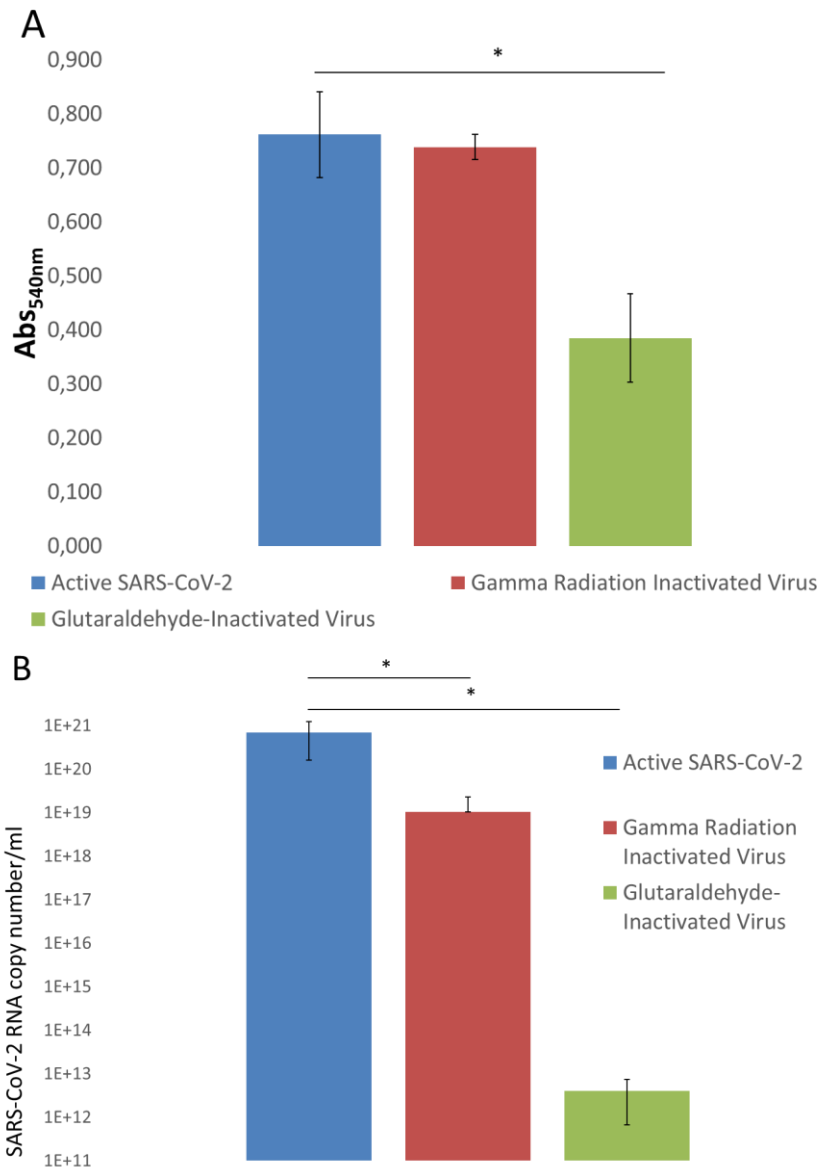

**Supplementary Figure 4. The difference in loss of Viral load upon Gamma-irradiation and the Glutaraldehyde-based chemical inactivation process.** An equal dose of SARS-CoV-2 virus was inactivated either with 2.5% glutaraldehyde in PBS (0.1 M, pH 7.2) for 2.5 h and isolated through 100 kDa Amicon filter or 25 kGy gamma-irradiation. Next, Single-radial-immunodiffusion (SRID) assay was performed to determine functional Spike protein in the

specimens by anti-SARS-CoV-2 Spike monoclonal antibody (Elabscience, E-AB-V1002). **A.** Spike protein-mono-clonal antibody interaction was assessed by microplate reader at 540nm absorbance. **B.** SARS-CoV-2 RNA copy number of the specimens which were untreated control, gamma-irradiated, or chemically inactivated determined by RT-PCR. Experiments were repeated three times. \* $p < 0.05$

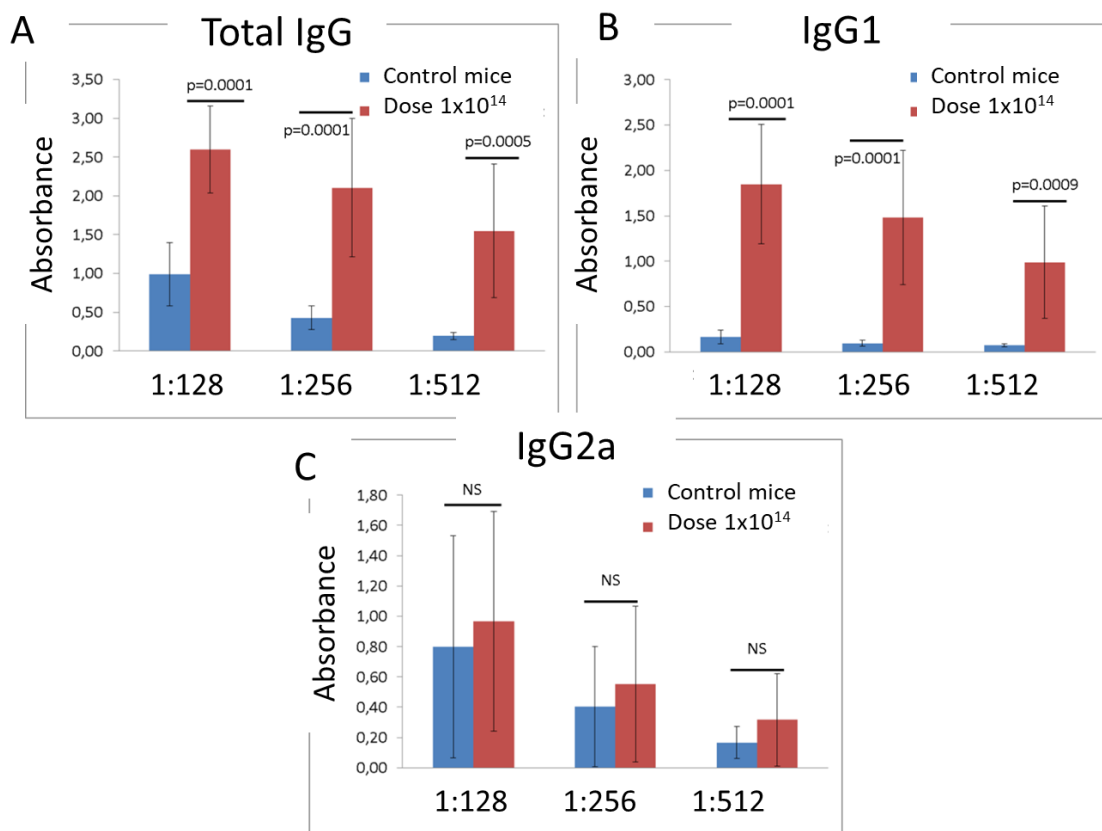

**Supplementary Figure 5. Subgroups of SARS-CoV-2 antibody produced upon immunization of BALB/c mice. A. Total IgG. B. IgG1 and C. IgG2a**
